# Supplementary material for: Acyl-CoA-Binding Protein (ACBP) genes: Their roles in response to abiotic stress and exogenous hormone application in barley(Hordeum vulgare L.)
Source: Research Square preprint supplement (doi:10.21203/rs.3.rs-3893037/v1), 2024-01-31
Supplement: Supplementary file 1 [file 3cd57be70d1f4c77ef472dd3.xlsx]

## Sheet: HvACBP7
Haplotype	Titetan_weedy_barley	qingke_landrace_barley	qingke_cultivar_barley	wild_barley	cultivar_barley	landrace_barley
Hap_1	0	0	0	51	0	2
Hap_2	0	0	0	7	0	1
Hap_3	0	0	0	2	6	7
Hap_4	0	0	1	4	14	35
Hap_5	0	0	0	23	8	14
Hap_6	0	0	0	1	3	6
Hap_7	3	1	2	2	10	38
Hap_8	1	5	3	2	1	2
Hap_9	0	4	1	2	5	24
Hap_10	5	54	27	3	6	6

## Sheet: HvACBP8
Haplotype	Tibetan_weedy_barley	qingke_landrace_barley	qingke_cultivar_barley	wild_barley	landrace_barley	cultivar_barley
Hap_1	0	0	0	4	0	0
Hap_2	0	0	0	2	0	1
Hap_3	0	0	0	14	4	0
Hap_4	0	0	0	11	16	6
Hap_5	0	0	0	0	2	2
Hap_6	1	0	0	7	32	20
Hap_7	1	2	1	10	15	2
Hap_8	2	13	2	21	27	4
Hap_9	2	35	28	24	30	13
