# Supplementary material for: Acyl-CoA-Binding Protein (ACBP) genes: Their roles in response to abiotic stress and exogenous hormone application in barley(Hordeum vulgare L.)
Source: Research Square preprint supplement (doi:10.21203/rs.3.rs-3893037/v1), 2024-01-31
Supplement: Supplementary file 2 [file bbbdfead4177458eb05ee71b.xlsx]

## Sheet: Table1
Class	Number	Gene name	Number of amino acids	Theoretical pI	Molecular weight (average)	Instability index	Aliphatic index	Grand average of hydropathicity	Alpha helix (%)	Extended strand (%)	Beta turn (%)	Random coil (%)	Domain	Euk-mPLoc 2.0
Class Ⅰ	HvACBP1	HORVU.MOREX.r3.1HG0076680.1	109	6.22	12125.9	41.08	66.33	-0.189	0.3486	0.2661	0.0367	0.3486	ACBP	Cytoplasm
	HvACBP2	HORVU.MOREX.r3.2HG0124500.1	102	5.28	10977.5	30.54	69.8	-0.089	0.2745	0.2745	0.1275	0.3235	ACBP	Cytoplasm
	HvACBP6	HORVU.MOREX.r3.4HG0409130.1	260	6.04	28947.5	38.41	74.27	-0.369	0.3231	0.2154	0.0769	0.3846	ACBP	Cytoplasm
	HvACBP8	HORVU.MOREX.r3.7HG0640790.1	93	4.99	10237.5	35.08	69.46	-0.566	0.6774	0.0215	0.0323	0.2688	ACBP	Cytoplasm
Class II	HvACBP3	HORVU.MOREX.r3.2HG0213220.2	324	4.4	34609.3	52.97	78.43	-0.351	0.4414	0.0586	0.0802	0.4198	ACBP	Cytoplasm
	HvACBP4	HORVU.MOREX.r3.2HG0213280.1	236	4.6	26190.4	42.2	83.47	-0.226	0.4195	0.1102	0.1017	0.3686	ACBP	Cytoplasm
Class III	HvACBP5	HORVU.MOREX.r3.4HG0392690.1	533	4.23	56990	48.9	84.07	-0.417	0.5291	0.0657	0.0732	0.3321	ACBP	Cytoplasm
Class Ⅳ	HvACBP7	HORVU.MOREX.r3.5HG0530170.1	669	5	72619.1	46.26	78.61	-0.418	0.3572	0.1659	0.0673	0.4096	ACBP	Cytoplasm
